# Supplementary material for: CLARK: fast and accurate classification of metagenomic and genomic sequences using discriminative k-mers
Source: PubMed Central journal article supplement (PMC4428112; doi:10.1186/s12864-015-1419-2), 2015-03-25
Supplement: 12864_2015_1419_MOESM1_ESM.pdf [file 12864_2015_1419_MOESM1_ESM.pdf]

CLARK: Fast and Accurate Classification of Metagenomic and  
Genomic Sequences using Discriminative  $k$ -mers  
**Supplementary Material**

# Supplementary Note 1: Algorithmic details

## Notations and Problem Definition

Object and targets are described by their *sequence* which is a non-empty string over the alphabet  $\Sigma = \{A, T, G, C\}$  of *nucleotides* ( $U$  can replace  $T$  in the case of mRNA). Observe that two bits are sufficient to identify a nucleotide. Given a sequence  $s$ , we use  $|s|$  to denote its length. A *target* is a sequence representing either a chromosome arm, or a chromosome, or a genome, or a species (i.e., a set of genomes from different individuals), or a genus (i.e., a set of genomes). We use the variable  $n$  to indicate the number of targets. An *object* is a sequence that is assumed to originate from at most one of the  $n$  targets. We use the variable  $p$  to indicate the number of objects.

We say that a non-empty object  $s$  *originates* from target  $g$  if sequence  $s$  is a substring of sequence  $g$ . Given  $n$  targets  $\{g_1, g_2, \dots, g_n\}$  we say that a sequence  $s$  is *specific* to target  $g_c$  (or  $g_c$ -*specific*)  $1 \leq c \leq n$ , if  $s$  is a substring of  $g_c$  and  $s$  is not a substring of any other target. We say that a sequence  $s$  is a *repeat* of  $\{g_1, g_2, \dots, g_n\}$  if it is a substring of more than one target.

Given a positive integer  $k$ , a  $k$ -*mer* is any sequence of  $k$  consecutive nucleotides. Given that  $|\Sigma| = 4$ , there is a total of  $4^k$  possible  $k$ -mers, i.e., any  $k$ -mer can be then associated to a unique *dimension* ranging from 1 to  $4^k$ . It is easy to observe that exactly  $N - k + 1$   $k$ -mers (distinct or not) can be extracted from a sequence of length  $N$ , when  $k \leq N$ .

The assignment problem can be defined as follows. Given a set of targets  $\{g_1, g_2, \dots, g_n\}$ , a set of objects  $\{s_1, s_2, \dots, s_p\}$ , and a positive integer  $k$ , assign each object  $s_i$  to the target  $g_{c^*}$ , such that the number of  $g_c$ -specific  $k$ -mers contained for  $s_i$  is the highest (where ties are broken arbitrarily) for  $c = c^*$ , where  $1 \leq c \leq n$ .

The  $k$ -*spectrum*  $T(s)$  of an object  $s$  is the vector of size  $4^k$  defined as follows: for any  $1 \leq i \leq 4^k$ ,  $T(s)_i$  is the number of occurrences in  $s$  of the  $k$ -mer with dimension  $i$ . Now consider  $(E_k, \|\cdot\|_1)$ , where  $E_k = \mathbb{R}^{4^k}$  is a normed vector space of dimension  $4^k$  and  $\|\cdot\|_1$  is the 1-norm. Although spectrums are vectors of integers, it is more convenient to consider the set  $\mathbb{R}$  rather than  $\mathbb{Z}$  because the former is a field. Thus,  $(E_k, \langle \cdot | \cdot \rangle)$ , where  $\langle \cdot | \cdot \rangle$  is the standard dot product, is an Euclidean space, on which useful notions such as projection and orthogonality can be defined. If  $\vec{e}_i$  is the *unit vector* (entry  $i$  equal to 1 and 0 everywhere else), then  $(\vec{e}_1, \vec{e}_2, \dots, \vec{e}_{4^k})$  is the *canonical basis* of  $E_k$ .

The 1-norm of a vector  $\vec{v} \in E_k$  is defined as  $\|\vec{v}\|_1 = \sum_{i=1}^{4^k} |v_i|$ . Since  $E_k$  is a vector space of finite dimensions, all  $p$ -norms are equivalent in  $E_k$ . However, we prefer the 1-norm due some of its properties. For instance, for any  $k$ -spectrum  $T(s)$  for a sequence  $s$  of length  $N$ , we have  $\|T(s)\|_1 = N - k + 1$ . In other words, sequences of same length have the same 1-norm.

## Probability of Two Sequences to Share the Same $k$ -spectrum

We first observe that the mapping between a sequence and its spectrum is not one-to-one (i.e., it is not invertible), because the spectrum ignores the order of  $k$ -mers in the sequence. The consequence is that two or more distinct sequences can have the same spectrum. For example, the spectrums of all  $N - 1$  circular rotations of a string of length  $N$  are identical to each other.

We now proceed to compute the probability that a pair of sequences (targets or objects) of length  $N$  share

the same  $k$ -spectrum. The problem of recovering a sequence from a set of  $k$ -mers is one of the “flavors” of genome assembly. From the  $k$ -spectrum one can build the corresponding *de Bruijn graph* (nodes are  $k$ -mers and edges connect two nodes if the two corresponding  $k$ -mers have a  $k - 1$  overlap). Any Eulerian path of this graph recovers one of sequences having such spectrum [1]. Here we want to count the number of sequences with the same  $k$ -spectrum, which is equal to the number of distinct Eulerian paths in the corresponding de Bruijn graph. Given a sequence  $s$ , we call  $B_{k,N}$  the set of distinct sequences of length  $N$  whose  $k$ -spectrum is  $T(s)$ . Then,  $|B_{k,N}|$  is the number of Eulerian paths in the de Bruijn graph  $G_s$  built from the  $k$ -spectrum of  $s$ .

Let us consider a set  $D$  of sequences of length  $N$  and an integer  $k$ . Let  $s, s'$  be two sequences in  $D$ . The probability that  $s$  and  $s'$  have the same  $k$ -spectrum is

$$P(T(s) = T(s') | s \neq s') = \frac{|B_{k,N} \cap D|}{|D| - 1}$$

Since we will be using spectrums for classification, we want this probability of a conflict to be as small as possible. However,  $|B_{k,N} \cap D|$  is not easy to evaluate for a generic set  $D$  of sequences. We can compute this quantity when  $D$  is the set of all sequences of length  $N$ . In this case,  $|D| = 4^N$  and  $|B_{k,N} \cap D| = |B_{k,N}|$ .

The quantity  $|B_{k,N}|$  is an upper bound to the number of Eulerian paths in  $G_s$  for a sequence  $s$  of length  $N$ . Thus, we have  $|B_{k,N}| \leq (N - k + 1)4^{N-k-3} \cdot 3 \cdot 2 \cdot 1$ , because there are at most  $(N - k + 1)$  possibilities for choosing the first  $k$ -mer, then at most four distinct  $k$ -mers for the second position, then at most four distinct  $k$ -mers for the third position, and so on and so forth. For the last three positions there are three, then two, and one  $k$ -mer. Thus,

$$P(T(s) = T(s') | s \neq s') \leq \frac{(N - k + 1)4^{N-k-3} \cdot 3 \cdot 2 \cdot 1}{4^N - 1} = \frac{2(N - k + 1)}{4^{k+2}} \quad (1)$$

For instance, when  $N$  is small (say,  $N = 1000$ ), and  $k=12$ , we can estimate that  $P(T(s) = T(s') | s \neq s') \leq 10^{-5}$ . If  $N$  is bigger (say,  $N = 10^8$ , which the size of a small genome) and  $k = 12$ , then  $P(T(s) = T(s') | s \neq s') \leq 0.7451$ . For  $N = 10^8$  and  $k = 19$  we get  $P(T(s) = T(s') | s \neq s') \leq 4.547 \cdot 10^{-5}$ , and for  $N = 10^9$  and  $k = 19$ , we get  $P(T(s) = T(s') | s \neq s') \leq 4.547 \cdot 10^{-4}$ .

Inequality 1 can be used to determine the value of  $k$  that will make the probability of a spectrum conflict small enough (given  $N$ ). Recall that we assumed that  $D$  contains all possible sequences of length  $N$ . When  $|D| \ll 4^N$ , it is reasonable to assume that Inequality 1 still holds when  $k$  is large enough, since in this case  $|B_{k,N} \cap D| = 0$  (e.g., consider the extreme case  $N = k$ ).

## Spectral decomposition

Now we describe how  $k$ -spectrums can be used to assign objects to targets. Given a target  $g_c$ ,  $1 \leq c \leq n$ , let  $T(g_c)$  be its  $k$ -spectrum. Henceforth, we assume that vectors  $T(g_1), T(g_2), T(g_3), \dots, T(g_n)$  are non-null and linearly independent, i.e., the determinant of the matrix obtained from these vector is not zero:

$$\det [T(g_1), T(g_2), T(g_3), \dots, T(g_n)] \neq 0 \quad (2)$$

This assumption is met in practice and it is sufficiently general due to the fact that sequences from distinct targets contain unique substrings. From Inequality 1, we can also choose  $k$  large enough so the probability of two distinct sequences to share the same spectrum to be as small as needed.

Let  $B_c$  be the basis of unit vectors such that these unit vectors are associated to non-zero-count dimensions in the  $k$ -spectrum of  $T(g_c)$ , i.e.,  $B_c = (\vec{e}_i)_{i \in I_c}$ , where  $I_c = \{i, i \in \{1, 2, 3, \dots, 4^k\} \mid T(g_c) \cdot \vec{e}_i \neq 0\}$ . Since  $B_c$  contains all non-null dimensions from  $T(g_c)$ , we can define  $E_k^c = \text{span}(B_c)$ , which is the space described by linear combinations of the unit vectors in  $B_c$ .  $E_k^c$  represents the vector space associated to the  $k$ -spectrum of target  $g_c$ .

Now we are going to build another basis, but only for target-specific  $k$ -mers. Let  $\tilde{B}_c$  be the basis of unit vectors corresponding to the set of dimension of non-zero counts in the  $k$ -spectrum of  $T(g_c)$ , which has at the same time, zero counts in the spectrum of other targets, i.e.,  $\tilde{B}_c = (\vec{e}_i)_{i \in \tilde{I}_c}$ , where  $\tilde{I}_c = \{i, i \in \{1, 2, 3, \dots, 4^k\} \mid T(g_c) \cdot \vec{e}_i \neq 0 \text{ and for all } c' \neq c \text{ we have } T(g_{c'}) \cdot \vec{e}_i = 0\}$ . By the Equation 2, we have for all  $c$ ,  $\tilde{B}_c \neq \emptyset$  (if for some  $c$ ,  $\tilde{B}_c = \emptyset$ , then we need to increase  $k$ ). Therefore, we can define  $\tilde{E}_k^c = \text{span}(\tilde{B}_c)$ , which is the vector space built from all subspaces specific to  $E_k^c$ .

$\tilde{E}_k^c$  is called *target-specific  $k$ -mer space* of  $g_c$  or simply  $g_c$ -specific  $k$ -mer space. If the set of targets  $\{g_1, g_2, \dots, g_n\}$  represents chromosome arms, and the sequences for the two arms overlap each other, then it is possible to define centromere-specific  $k$ -mer spaces. Given  $(c, c')$  representing the two arms of the same chromosome (for example in barley, 2HS and 2HL), let  $\tilde{B}_{c,c'}$ ,  $c < c'$  be the basis such that  $\tilde{B}_{c,c'} = (\vec{e}_i)_{i \in \tilde{I}_{c,c'}}$ , where  $\tilde{I}_{c,c'} = \{i, i \in \{1, 2, 3, \dots, 4^k\} \mid T(g_c) \cdot \vec{e}_i \neq 0 \text{ and } T(g_{c'}) \cdot \vec{e}_i \neq 0 \text{ and } \forall d \neq c, d \neq c', T(g_d) \cdot \vec{e}_i = 0\}$ .  $\tilde{B}_{c,c'}$  contains all dimensions present only in both  $T(g_c)$  and  $T(g_{c'})$ . In other words,  $\tilde{B}_{c,c'}$  contains  $k$ -mers specific to the overlap between  $g_c$  and  $g_{c'}$ . Since we assume that the overlap between  $g_c$  and  $g_{c'}$  defines the centromere,  $\tilde{E}_k^{c,c'} = \text{span}(\tilde{B}_{c,c'})$  is the centromere-specific  $k$ -mer space. For convenience in notations, we denote  $\tilde{B}_{c,c'}$  by  $\tilde{B}_d$ , where  $d$  is an integer such that  $n < d \leq n + m$ ,  $d$  is unique to the pair  $(c, c')$ , and  $m$  is the total number of non-null centromere-specific  $k$ -mer spaces ( $m \leq n/2$ ). At most  $n/2$  centromeres can be defined given a set of  $n$  chromosomal sequences, because some centromeres are not defined in the case of no overlap. In the case there is no overlap, then  $m = 0$ .

## Orthogonal decomposition

The vector spaces  $\tilde{E}_k^c$  allow a decomposition of the  $k$ -mer vector space  $E_k$ . This section explains the construction of this decomposition. First, we prove the fact that a  $k$ -mer from an object  $s$  cannot belong to more than one target specific  $k$ -mer space.

**Claim 1.** For all  $(c, c') \in \{1, \dots, n + m\}^2$ ,  $c \neq c'$ , we have  $\tilde{E}_k^c \perp \tilde{E}_k^{c'}$ .

*Proof.* By construction, for all  $\vec{u} \in \tilde{E}_k^c, \forall \vec{u}' \in \tilde{E}_k^{c'}$ , we have  $\vec{u} = \sum_{i \in \tilde{I}_c} u_i \vec{e}_i$  and  $\vec{u}' = \sum_{i \in \tilde{I}_{c'}} u'_i \vec{e}_i$ . Then,  $\vec{u} \cdot \vec{u}' = \sum_{i \in \{1, 2, 3, \dots, 4^k\}} u_i u'_i = \sum_{i \in \tilde{I}_c \cap \tilde{I}_{c'}} u_i u'_i$ . By definition of the basis,  $\tilde{I}_c \cap \tilde{I}_{c'} = \emptyset$  because  $c \neq c'$ , so  $\vec{u} \cdot \vec{u}' = 0$ .  $\square$

Since we have established that spaces  $\tilde{E}_k^c$  are pairwise orthogonal, we can define  $\tilde{E}_k$  as the vector space resulting from the direct sum of all  $\tilde{E}_k^c$ , i.e.,

$$\tilde{E}_k = \bigoplus_{c=1}^{n+m} \tilde{E}_k^c \quad (3)$$

Since  $\tilde{E}_k$  contains non-null spaces,  $\tilde{E}_k$  is not a null space. Also, since  $E_k$  is an Euclidean space and  $\tilde{E}_k \subset E_k$ , we can define the orthogonal decomposition of  $E_k$  as

$$E_k = \tilde{E}_k \oplus \tilde{E}_k^\perp \quad (4)$$

where the vector space  $\tilde{E}_k^\perp$  represents the space of common  $k$ -mers within all targets.

The last two relations are useful when we consider the assignment of an object  $s$  to a target sequence  $g_c$ . Since  $T(s) \in E_k$ , Equation 4 suggests that there must exist two unique vectors  $\vec{u}$  and  $\vec{u}^\perp$  such that  $T(s) = \vec{u} + \vec{u}^\perp$ , where  $\vec{u}$  is the orthogonal projection of  $T(s)$  to  $\tilde{E}_k$ , and  $\vec{u}^\perp$  is the orthogonal projection of  $T(s)$  to  $\tilde{E}_k^\perp$ . In other words,  $\vec{u} = T(s)_{/\tilde{E}_k}$ , and  $\vec{u}^\perp = T(s)_{/\tilde{E}_k^\perp}$ . Let us now focus on  $\vec{u}$ . Equation 3 allows us to decompose this vector by projecting it into each  $\tilde{E}_k^c$ :

$$\vec{u} = T(s)_{/\tilde{E}_k} = \sum_{c=1}^{n+m} T(s)_{/\tilde{E}_k^c}$$

It follows that

$$\|\vec{u}\|_1 = \left\| T(s)_{/\tilde{E}_k} \right\|_1 = \sum_{c=1}^{n+m} \left\| T(s)_{/\tilde{E}_k^c} \right\|_1 \quad (5)$$

where  $\left\| T(s)_{/\tilde{E}_k^c} \right\|_1$  is the count of  $g_c$ -specific  $k$ -mers in  $s$ . As a consequence, projecting the spectrum of any object  $s$  to each target-specific space  $\tilde{E}_k^c$  reveals the uniquely shared substring between object  $s$  and target  $c$ .

## Orthogonal projections

Let us now introduce more properties based on the decomposition described above.

**Claim 2.** *If an object  $s$  is not a substring of a target  $g_c$ , then  $\left\| T(s)_{/\tilde{E}_k^c} \right\|_1 = 0$ .*

*Proof.* If  $s$  is not a substring of  $g_c \in \{g_1, g_2, \dots, g_n\}$  then any  $k$ -mer from  $s$  cannot be  $g_c$ -specific. Therefore, the count  $g_c$ -specific  $k$ -mers contained in  $s$  is 0. The conclusion follows.  $\square$

**Claim 3.** *If  $s$  is a repeat of  $\{g_1, g_2, \dots, g_n\}$  and  $m = 0$  then, for all  $c \in \{1, 2, \dots, n\}$ , we have  $\left\| T(s)_{/\tilde{E}_k^c} \right\|_1 = 0$ .*

*Proof.* Recall that  $T(s) = \vec{u} + \vec{u}^\perp$  and  $\|\vec{u}\|_1 = \sum_{c \in \{1, 2, \dots, n\}} \left\| T(s)_{/\tilde{E}_k^c} \right\|_1$ . For any  $c$ ,  $\left\| T(s)_{/\tilde{E}_k^c} \right\|_1$  is the count of  $k$ -mers specific to  $g_c$  contained in  $s$ . Since  $m = 0$ , there is no centromere-specific space. Now, let us assume for some  $c$ ,  $\left\| T(s)_{/\tilde{E}_k^c} \right\|_1 \neq 0$ , this implies (since there is no centromere-specific spaces) that  $s$  contains at least one  $k$ -mer that is specific to  $g_c$  and no other target. So  $s$  contains a substring that appears only in one target sequence. In other words,  $s$  is not repeated in its entirety, so this contradicts the hypothesis that  $s$  is a repeat. This implies that for all  $c \in \{1, 2, \dots, n\}$ , we have  $\left\| T(s)_{/\tilde{E}_k^c} \right\|_1 = 0$ .  $\square$

**Theorem 1.** *Given a set of targets  $\{g_1, g_2, \dots, g_n\}$ , and a set of objects  $\{s_1, s_2, \dots, s_p\}$ , if  $s_l$  originates from at least one target in  $\{g_1, g_2, \dots, g_n\}$  and  $m = 0$ , then there exists at most one index  $c^*$  ( $1 \leq c^* \leq n$ ) such that for all  $c \in \{1, 2, \dots, n\}$ ,  $c \neq c^*$ ,  $\left\| T(s_l)_{/\tilde{E}_k^c} \right\|_1 = 0$ , where for each target  $c$ ,  $1 \leq c \leq n$ ,  $\tilde{E}_k^c$  is the  $g_c$ -specific  $k$ -mer space.*

*Proof.* Let  $s_l$  be a sequence in  $\{s_1, s_2, \dots, s_p\}$ . If  $s_l$  is a repeat of  $\{g_1, g_2, \dots, g_n\}$  then Claim 3 holds. Then, the conclusion follows. Otherwise, if  $s_l$  is not a repeat then  $s_l$  is a substring of exactly one sequence  $g_{c^*}$ . In addition,  $m = 0$  so  $s_l$  is not a substring of any sequence other than  $g_{c^*}$ . So by Claim 2, for all  $c \in \{1, 2, \dots, n\}, c \neq c^*$ ,  $\left\|T(s_l)_{/\tilde{E}_k^c}\right\|_1 = 0$ .  $\square$

When  $s_l$  is a substring of exactly one target sequence  $g_{c^*}$ , if  $s_l$  does not contain any  $g_{c^*}$ -specific  $k$ -mers then  $\left\|T(s_l)_{/\tilde{E}_k^{c^*}}\right\|_1 = 0$ . This may happen when the sequence  $s$  is too short to capture any  $g_{c^*}$ -specific  $k$ -mers or if  $k$  is too small.

However, if  $\left\|T(s_l)_{/\tilde{E}_k^{c^*}}\right\|_1 \neq 0$  then the origin of the sequence  $s$  is  $g_{c^*}$ .

**Theorem 2.** *Given a set of targets  $\{g_1, g_2, \dots, g_n\}$ , and a set of objects  $\{s_1, s_2, \dots, s_p\}$ , if sequence  $s_l$  originates from at least one target in  $\{g_1, g_2, \dots, g_n\}$  and targets are chromosome arms such that  $m \neq 0$ , then there exists at most two distinct indexes  $(d, e) \in \{1, 2, \dots, n+m\}^2$  such that for all  $c \in \{1, 2, \dots, n+m\}, c \neq d, c \neq e$ ,  $\left\|T(s_l)_{/\tilde{E}_k^c}\right\|_1 = 0$ .*

*Proof.* We consider four cases. In the first case  $s_l$  is a repeat and is a substring of at least three targets then  $s_l$  can not contain any specific  $k$ -mer to any target. Then, for all  $c \in \{1, 2, \dots, n+m\}$ , we have  $\left\|T(s)_{/\tilde{E}_k^c}\right\|_1 = 0$ . The conclusion follows.

In the second case,  $s_l$  is a repeat and is a substring of two targets  $g_{c_1}$  and  $g_{c_2}$ . Assume that  $g_{c_1}$  and  $g_{c_2}$  are the arms of the same chromosome. If  $s_l$  is a substring in the overlap between  $g_{c_1}$  and  $g_{c_2}$  then  $s_l$  can contain  $k$ -mers specific to the corresponding centromere. It follows that there exists  $d \in \{n+1, \dots, n+m\}$  such that  $\left\|T(s_l)_{/\tilde{E}_k^d}\right\|_1$  may be not null, however for all  $c \in \{1, 2, \dots, n+m\}, c \neq d$ , we have  $\left\|T(s)_{/\tilde{E}_k^c}\right\|_1 = 0$  and the conclusion follows. Otherwise,  $s_l$  is a repeat and any  $k$ -mer in  $s_l$  can not be specific to any target (because it appears twice) or any centromere (because it is not in the overlap). So for all  $c \in \{1, 2, \dots, n+m\}$ , we have  $\left\|T(s)_{/\tilde{E}_k^c}\right\|_1 = 0$ . The conclusion follows. If  $g_{c_1}$  and  $g_{c_2}$  are not the arms of the same chromosome then  $s_l$  is merely a repeat, therefore the conclusion follows.

In the third case  $s_l$  is a not repeat ( $s_l$  originates from  $g_d$ ) and is a partial substring of the overlap between two targets  $g_d$  and  $g_{d'}$ . Say  $g_d$  and  $g_{d'}$  are the arms of the same chromosome. Then,  $s_l$  can contain  $g_d$ -specific  $k$ -mers, and also  $k$ -mers specific to the centromere (formed by  $g_d$  and  $g_{d'}$ ), and no other  $k$ -mers specific to other space. It follows that  $\left\|T(s_l)_{/\tilde{E}_k^d}\right\|_1$  may be not null and there exists  $e \in \{n+1, \dots, n+m\}$  such that  $\left\|T(s_l)_{/\tilde{E}_k^e}\right\|_1$  may be not null either. Thus, the conclusion follows. If  $g_d$  and  $g_{d'}$  are not the arms of the same chromosome, then  $s_l$  can only contain  $g_d$ -specific  $k$ -mers, and the conclusion follows.

In the fourth case,  $s_l$  is not a repeat and is not a substring (nor a partial substring) of any overlap between two targets then  $s_l$  is a substring of exactly one sequence  $g_{c^*}$ . Similarly as the previous proof, the conclusion follows.  $\square$

Theorems 1 and 2 show that, given an object  $s$  the projections of  $T(s)$  on all targets-specific spaces are guaranteed to be null, except for the one that is related to the origin of  $s$ . As a consequence, if a sequence  $s$  is known to be a substring of at most one target in  $\{g_1, g_2, \dots, g_n\}$ , then the problem of assigning  $s$  is reduced to the problem of studying non-null projections of  $T(s)$  on the  $n+m$  specific vector spaces.

## Assignment method

The two previous theorems lay the theoretical foundation on which CLARK's assignment method was designed. Given an object  $s$ , CLARK first computes the projections of the spectrum  $T(s)$  on all targets-specific spaces.

If the number of non-null projection is zero, then object  $s$  is not assigned (a higher value of  $k$  might be necessary). If there is exactly one non-null projection, say  $\|T(s)_{/\tilde{E}_k^c}\|_1 \neq 0$ , for some  $c$ , then object  $s$  contains  $g_c$ -specific  $k$ -mers. In this case, CLARK assigns object  $s$  to target  $c$ . If there is more than one non-null projections, say  $\|T(s)_{/\tilde{E}_k^c}\|_1 \neq 0$ , for  $c = c_1$  and  $c = c_2$ , we expect  $c_1$  and  $c_2$  to be arms of the same chromosome. In this case, the chromosome is identified, and  $s$  is assigned to  $c_1$  if  $\|T(s)_{/\tilde{E}_k^{c_1}}\|_1 > \|T(s)_{/\tilde{E}_k^{c_2}}\|_1$ , otherwise  $s$  is assigned to  $c_2$ .

The previous cases can be summarized by the following rule. First compute

$$c^* = \arg \max_{1 \leq c \leq n+m} \|T(s)_{/\tilde{E}_k^c}\|_1 \quad (6)$$

then object  $s$  is assigned to target  $c^*$ .

Theoretically, one should expect a large number of projections to be zero. In practice, with real (noisy) data null-expected projections will have instead low counts. In other words, instead of expecting up to two non-null projections, we should expect up to two projections having high 1-norm compared to all others.

Given an object  $s$ , CLARK computes the highest norm, namely  $\|T(s)_{/\tilde{E}_k^{c^*}}\|_1$ , and the second highest norm, namely  $\|T(s)_{/\tilde{E}_k^{c^{**}}}\|_1$ . Then, CLARK evaluates the confidence of the assignment by using the following confidence score, which ranges from 0.5 to 1.

$$\text{confidence} = \frac{\|T(s)_{/\tilde{E}_k^{c^*}}\|_1}{\|T(s)_{/\tilde{E}_k^{c^*}}\|_1 + \|T(s)_{/\tilde{E}_k^{c^{**}}}\|_1}$$

Another useful statistic is  $\gamma = \sum_{1 \leq c \leq n+m} \|T(s)_{/\tilde{E}_k^c}\|_1 / \|T(s)\|_1$ , which indicates the proportion of  $k$ -mers hitting all targets.

## CLARK's algorithm

Given a set of targets  $\{g_1, g_2, \dots, g_n\}$ , a set of objects  $\{s_1, s_2, \dots, s_p\}$  and an integer  $k$ , CLARK's computes for each object  $s$  (1) the top two target assignments, (2) the confidence score, (3) the number of hits against each target and (4)  $\gamma$ .

To achieve efficient computations, we use a hash table to store all  $k$ -mers from the targets. This data structure allows one to remove all common  $k$ -mers, and also performs fast queries (constant time, on average). We have designed our own hash table of size  $L$  based on a chaining structure. The hash function  $h$  is defined as follows. Given a  $k$ -mer  $km$  represented by a number  $l$ , where  $l = \sum_{i=1}^k a[i]4^{i-1}$  (with  $a[i] = 0$  if  $km[i] = A$ ,  $a[i] = 1$  for  $C$ ,  $a[i] = 2$  for  $G$  and  $a[i] = 3$  for  $T$  or  $U$ ), we define  $h(l) = l \bmod L$ , where  $L$  is defined below. To reduce the amount of bits to be stored per  $k$ -mer, we only save in the hash table the

value  $l/L$  for bucket  $h(l)$ . Indeed, since  $L$  is known,  $h(l)$  and  $l/L$  contain enough information to compute back  $l$  because  $l = (l/L) \times L + h(l)$ . If  $k = 31$  and  $L > 4^{15}$  then  $(l/L)$  can be stored in four bytes. As a consequence, any 31-mer can be represented with only four bytes instead of eight. If  $k \leq 23$  and  $L > 4^{15}$  then two bytes are enough to store any  $k$ -mer; if  $k \leq 19$  and  $L > 4^{15}$  then only one byte is enough.

The implementation of our algorithm using a hash table is illustrated in Table S5.

## Supplementary Note 2: Confidence score analysis

Our software tool CLARK, unlike other most of other sequence classifiers, provides confidence scores. Here we want to study the relation between confidence scores and correctness of results.

Figure S1 shows the distribution of the number of assignments as a function of the confidence score for all the datasets presented in this study, namely barley BACs and unigenes (A2A), barley BACs (R2R and A2A), and the four metagenomic datasets (“HiSeq”, “MiSeq”, “simBA-5”, and “simHC.20.500”). Observe the high density of high confidence assignments in all cases, especially for “HiSeq” and “MiSeq” datasets. For all these datasets, when running CLARK in full mode, we observe that at least 95% of all assignments have confidence score higher or equal than 0.98. This is clear evidence that, in the full mode, conflicts in the classification rarely occur.

Figure S2 shows the proportion of correct assignments (y-axis) as a function of confidence score ranges (x-axis). Observe that at least 95% of assignments having confidence of 0.90 or higher are correct.

## References

- [1] COMPEAU, P. E., PEVZNER, P. A., AND TESLER, G. How to apply de Bruijn graphs to genome assembly. *Nature biotechnology* 29, 11 (2011), 987–991.



|                 | Installation/Database construction |                     |                  | Classification      |
|-----------------|------------------------------------|---------------------|------------------|---------------------|
|                 | Time (HH:MM)                       | RAM Peak usage (GB) | Memory Disk (GB) | RAM Peak usage (GB) |
| NBC             | 19:10                              | < 1                 | 52.0             | < 1                 |
| KRAKEN          | 06:07                              | 167.9               | 141.0            | 77.7                |
| CLARK           | 02:45                              | 164.1               | 42.4             | 70.1                |
| CLARK- <i>l</i> | 00:05                              | 3.8                 | < 1              | 2.8                 |

**Table S1:** Details of the time and memory usage (RAM and disk) for the installation (or database construction) of the 2,752 bacterial genomes of NCBI/RefSeq, and the classification of NBC, KRAKEN and CLARK, at the genus-level and in default mode. Measurements of the installation time and RAM peak usage are done for NBC, KRAKEN and CLARK using default settings and single-thread. RAM peak usage was obtained by the attribute `maximum resident set size` of the command `/usr/bin/time -v` available on Linux platforms.

|                   | “HiSeq” dataset |        |        |        |
|-------------------|-----------------|--------|--------|--------|
| Number of threads | 1               | 2      | 4      | 8      |
| KRAKEN            | 2,332           | 3,647  | 3,534  | 3,876  |
| CLARK             | 3,116           | 5,484  | 9,626  | 15,807 |
| KRAKEN-Q          | 6,224           | 7,712  | 7,693  | 7,506  |
| CLARK- <i>E</i>   | 32,450          | 39,841 | 46,386 | 52,896 |
|                   | “MiSeq” dataset |        |        |        |
| Number of threads | 1               | 2      | 4      | 8      |
| KRAKEN            | 1,361           | 2,038  | 3,605  | 3,616  |
| CLARK             | 1,670           | 3,040  | 4,905  | 8,120  |
| KRAKEN-Q          | 5,308           | 5,553  | 8,362  | 8,642  |
| CLARK- <i>E</i>   | 28,988          | 32,199 | 41,970 | 49,383 |

**Table S2:** Genus-level classification speed (expressed as  $10^3$  reads/min) as a function of the number of threads ( $k = 31$ ).

| <i>Targets</i> | <i>19-mers</i> | <i>discriminative 19-mers</i> | <i>assignments</i> | <i>low confidence</i> | <i>high confidence</i> |
|----------------|----------------|-------------------------------|--------------------|-----------------------|------------------------|
| 1H             | 180,176,713    | 108,894,740                   | 2,111              | 7.1%                  | 92.9%                  |
| 2HC            | -              | 814,357                       | 0                  | -                     | -                      |
| 2HL            | 103,679,920    | 64,700,161                    | 1,424              | 3.4%                  | 96.6%                  |
| 2HS            | 90,912,314     | 54,449,430                    | 1,071              | 3.5%                  | 96.5%                  |
| 3HC            | -              | 1,532,968                     | 0                  | -                     | -                      |
| 3HL            | 123,140,951    | 78,158,244                    | 1,411              | 3.3%                  | 96.7%                  |
| 3HS            | 111,951,787    | 70,473,478                    | 897                | 5.5%                  | 94.5%                  |
| 4HC            | -              | 3,105,047                     | 56                 | 67.9%                 | 32.1%                  |
| 4HL            | 106,999,773    | 64,749,958                    | 1,132              | 3.5%                  | 96.5%                  |
| 4HS            | 89,027,872     | 51,612,790                    | 890                | 4.4%                  | 95.6%                  |
| 5HC            | -              | 604,030                       | 0                  | -                     | -                      |
| 5HL            | 117,915,094    | 77,128,375                    | 1,658              | 2.8%                  | 97.2%                  |
| 5HS            | 58,067,400     | 34,037,607                    | 654                | 5.4%                  | 94.6%                  |
| 6HC            | -              | 469,530                       | 0                  | -                     | -                      |
| 6HL            | 74,485,223     | 44,221,184                    | 1,132              | 3.4%                  | 96.6%                  |
| 6HS            | 111,834,123    | 83,957,421                    | 846                | 6.5%                  | 93.5%                  |
| 7HC            | -              | 795,923                       | 0                  | -                     | -                      |
| 7HL            | 92,603,503     | 58,159,248                    | 1,179              | 3.6%                  | 96.4%                  |
| 7HS            | 90,217,777     | 55,276,671                    | 1,234              | 4.8%                  | 95.2%                  |
| <i>Total</i>   | 1,351,012,450  | 853,141,162                   | 15,695             | 4.6%                  | 95.4%                  |

**Table S3:** Summary of CLARK's assignment of 15,695 BACs (represented as assemblies) to barley chromosome arms (assemblies) and centromeres ( $k = 19$ ). Columns: (1) barley chromosome 1H, twelve chromosome arms, and six centromeres; (2) number of distinct  $k$ -mers in each target; (3) number of discriminative  $k$ -mers present in target sequences (must occur at least once); (4) number of assigned objects per target; (5) number of low confidence assignment per target; (6) number of high confidence assignment per target; (7) percentage of low confidence assignment (as a fraction of the total number of assigned objects per target); (8) percentage of high confidence assignment (as a fraction of the total number of assigned objects per target).

| IMG Taxon ID | Genome                                             |
|--------------|----------------------------------------------------|
| 640753002    | <i>Alkaliphilus metalliredigens</i> QYMF           |
| 640427103    | <i>Bradyrhizobium sp.</i> BTAi1                    |
| 637000047    | <i>Burkholderia cepacia</i> AMMD                   |
| 637000160    | <i>Chelativorans sp.</i> BNC1                      |
| 640069309    | <i>Clostridium thermocellum</i> ATCC 27405         |
| 637000088    | <i>Dechloromonas aromatica</i> RCB                 |
| 643348537    | <i>Desulfitobacterium hafniense</i> DCB-2          |
| 637000116    | <i>Frankia sp.</i> Cc13                            |
| 637000119    | <i>Geobacter metallireducens</i> GS-15             |
| 639633037    | <i>Marinobacter aquaeolei</i> VT8                  |
| 637000162    | <i>Methanosarcina barkeri</i> Fusaro, DSM 804      |
| 637000192    | <i>Nitrobacter hamburgensis</i> X14                |
| 639633046    | <i>Nocardioides sp.</i> JS614                      |
| 637000208    | <i>Polaromonas sp.</i> JS666                       |
| 637000216    | <i>Pseudoalteromonas atlantica</i> T6c             |
| 637000221    | <i>Pseudomonas fluorescens</i> Pf0-1               |
| 640069327    | <i>Rhodobacter sphaeroides</i> 2.4.1, ATCC BAA-808 |
| 637000260    | <i>Shewanella sp.</i> MR 7                         |
| 639633063    | <i>Syntrophobacter fumaroxidans</i> MPOB           |

**Table S4:** Genomes used in the “simHC.20.500” dataset (JGI database).

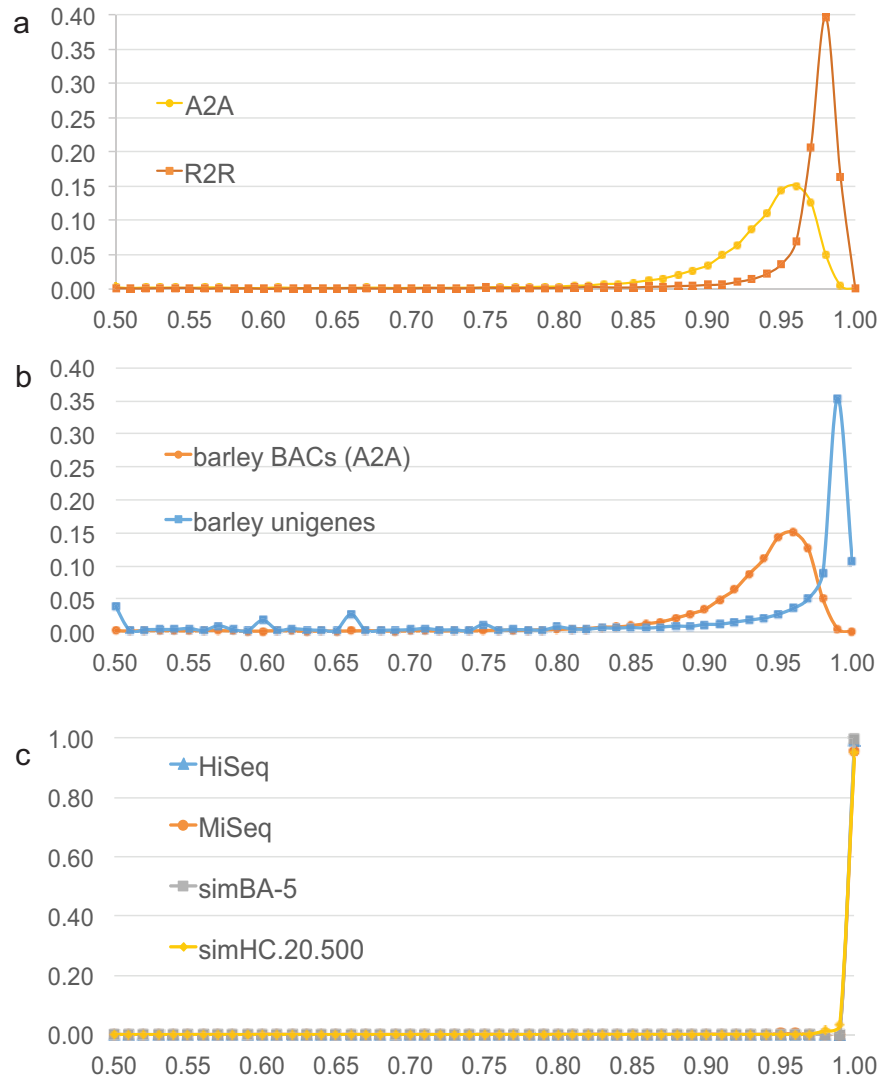

**Figure S1:** Distribution of the number of assignments as a function of the confidence score for (a) barley BACs (R2R) and (A2A) (b) barley unigenes and BACs (A2A) and (c) the four simulated metagenome sets (“HiSeq”, “MiSeq”, “simBA-5”, and “simHC.20.500”).

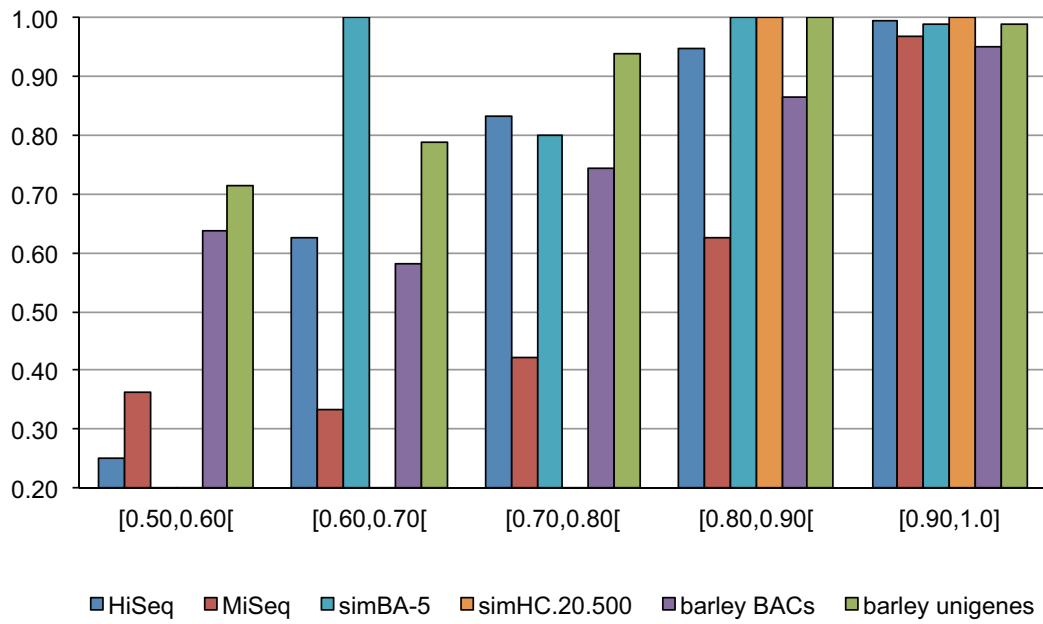

**Figure S2:** Probability (y-axis) of a correct assignment for a particular range of CLARK's confidence scores (x-axis).

---

|    |                                                                                                                         |
|----|-------------------------------------------------------------------------------------------------------------------------|
|    | Input: integer $k, n$ target sequences $(g_c)_{1 \leq c \leq n}$ , $p$ object sequences $(s_l)_{1 \leq l \leq p}$       |
| 1  | if hash table $H$ related to $(T(g_c))_{1 \leq c \leq n}$ already exists then                                           |
| 2  | load $H$                                                                                                                |
| 3  | goto 15                                                                                                                 |
| 4  | create an empty hash table $H$                                                                                          |
| 5  | for all $c, 1 \leq c \leq n$ :                                                                                          |
| 6  | for each $(km, w) \in T(g_c)$ :                                                                                         |
| 7  | if $(km \in H)$ then                                                                                                    |
| 8  | update the list of targets associated to $km$ by adding $c$<br>and increase the occurrence of $km$ by $w$               |
|    | else                                                                                                                    |
| 9  | insert $(km, w, c)$ in $H$                                                                                              |
| 10 | for each $km \in H$ :                                                                                                   |
| 11 | if the list of targets for $km$ has more than three elements then                                                       |
| 12 | remove $km$ from $H$                                                                                                    |
|    | else                                                                                                                    |
| 13 | if the list of origins for $km$ has exactly two elements<br>$(c_1, c_2, c_1 < c_2)$ and from different chromosomes then |
| 14 | remove $km$ from $H$                                                                                                    |
| 15 | for all $l, 1 \leq l \leq p$ :                                                                                          |
| 16 | if $T(s_l) = 0$ then                                                                                                    |
| 17 | output $l$ , “not assigned”                                                                                             |
|    | continue                                                                                                                |
| 18 | create $n + m$ empty bins: $b_1, b_2, \dots, b_n, \dots, b_{n+m}$                                                       |
| 19 | for each $(km, w) \in T(s_l)$ :                                                                                         |
| 20 | if $km \in H$ (in target $c$ ) then                                                                                     |
| 21 | $b_c = b_c + w$                                                                                                         |
| 22 | $c^* = \arg \max\{b_1, b_2, \dots, b_n, \dots, b_{n+m}\}$                                                               |
| 23 | $c^{**} = \arg \max\{\{b_1, b_2, \dots, b_n, \dots, b_{n+m}\} - \{b_{c^*}\}\}$                                          |
| 24 | $\gamma = \sum_{1 \leq t \leq n+m} b_t / T(s_l)$                                                                        |
| 25 | If $\gamma = 0$ then                                                                                                    |
| 26 | Output $l$ , “not assigned”                                                                                             |
|    | continue                                                                                                                |
| 27 | $confidence = \frac{b_{c^*}}{b_{c^*} + b_{c^{**}}}$                                                                     |
| 28 | output $l, b_1, b_2, \dots, b_{n+m}, \gamma, c^*, c^{**}, confidence$                                                   |

---

**Table S5:** Description of CLARK’s algorithm (“full” mode)
